# Supplementary material for: Molecular mechanism of the arrestin-biased agonism of neurotensin receptor 1 by an intracellular allosteric modulator
Source: Springer Nature journal article supplement (doi:10.1038/s41422-025-01095-7), 2025-03-21
Supplement: MOESM10 [file 41422_2025_1095_MOESM10_ESM.pdf]

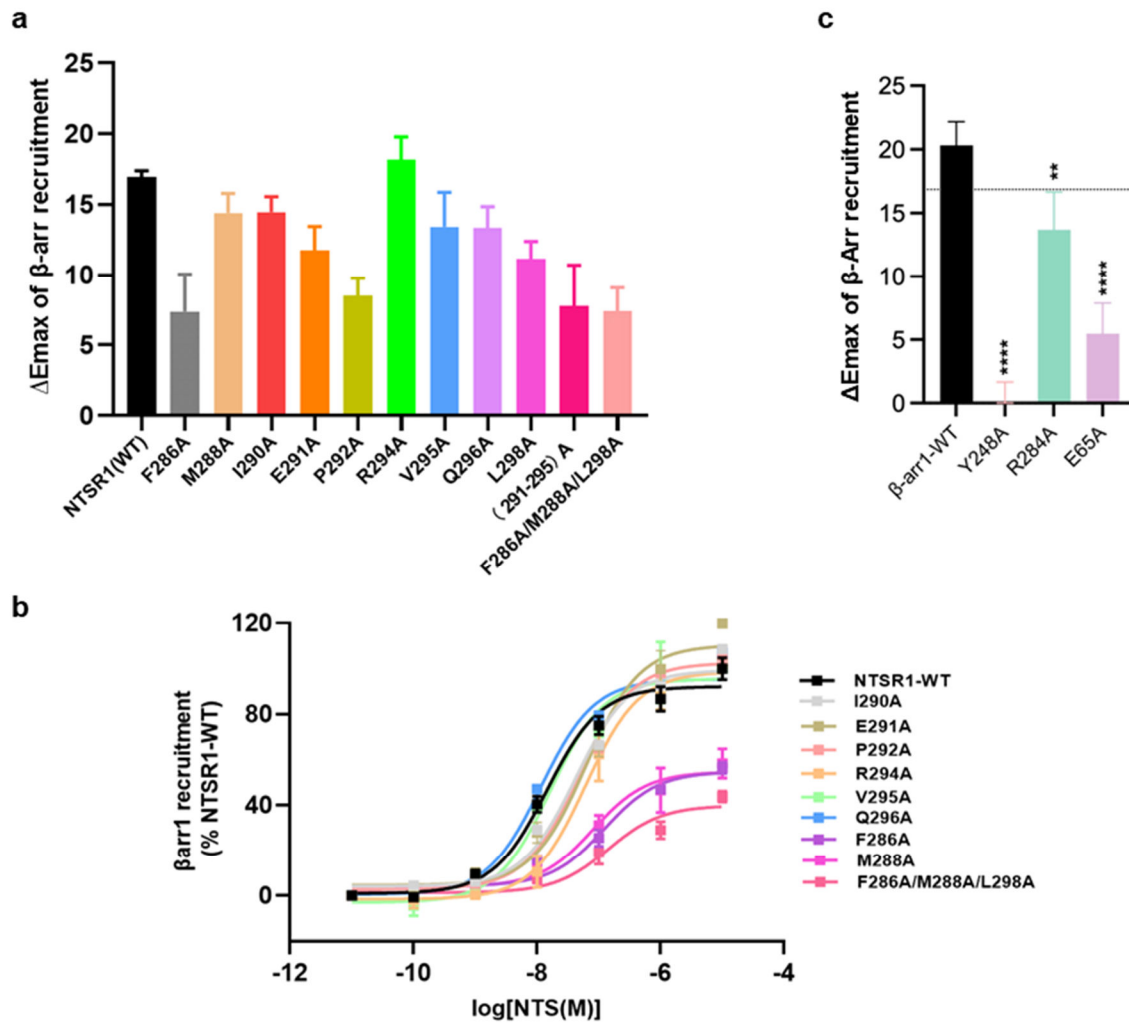

|      | WT         | I290A      | E291A      | P292A      | R294A      | V295A      | Q296A      | F286A      | M288A      | F286A/M288A/L298A |
|------|------------|------------|------------|------------|------------|------------|------------|------------|------------|-------------------|
| EC50 | 1.444e-008 | 4.189e-008 | 6.232e-008 | 4.694e-008 | 6.101e-008 | 1.633e-008 | 1.151e-008 | 1.232e-007 | 8.119e-008 | 1.434e-007        |
| Emax | 100        | 108.62     | 119.85     | 104.40     | 102.24     | 100.11     | 107.06     | 56.34      | 58.29      | 43.76             |

**Figure S10. βArr1 recruitment to NTSR1 induced by NTS and SBI-553.** (a) Recruitment of βArr1 to wild-type (WT) and mutated NTSR1 induced by NTS (1 nM) and SBI-553 (10 μM).  $\Delta E_{\max} = E_{\max}(\text{NTS} + \text{SBI-553}) - E_{\max}(\text{NTS})$ . Data are mean  $\pm$  s.d. from three independent experiments ( $n = 3$ ). (b) The βArr1 recruitment effects of the mutations on NTSR1 mutants stimulated only by NTS. (c) Recruitment of mutated βarr1 to wild-type NTSR1 induced by NTS (1 nM) and SBI-553 (10 μM).  $\Delta E_{\max} = E_{\max}(\text{NTS} + \text{SBI-553}) - E_{\max}(\text{NTS})$ . Data are mean  $\pm$  s.d. from at least three independent experiments ( $n \geq 3$ ).
